# Supplementary material for: Synthesis and polymerization of polyelectrolyte-based conductive inks: the protagonism of the coadjutant oxidizing salt
Source: Royal Society of Chemistry journal article supplement (doi:10.1039/d4py00574k), 2024-01-01
Supplement: d4py00574k1.pdf [file d4py00574k1.pdf]

*Supplementary Information for*

**Synthesis and polymerization of polyelectrolyte-based conductive inks: the protagonism of the coadjutant oxidizing salt.**

Germán D. Gómez Higuera,<sup>a, b</sup> Florian Günther,<sup>b, c</sup>, Bob C. Schroeder,<sup>d</sup> and Gregório C. Faria<sup>b\*</sup>

<sup>a</sup> *Departamento de Ciência e Engenharia de Materiais, Escola de Engenharia de São Carlos, Universidade de São Paulo (USP), São Carlos 13563-120, Brasil.*

<sup>b</sup> *Instituto de Física de São Carlos (IFSC), Universidade de São Paulo (USP), São Carlos 13560-970, Brasil.*

<sup>c</sup> *Instituto de Geociências e Ciências Exatas (IGCE), Universidade Estadual de São Paulo (UNESP), Rio Claro 13506-900, Brasil.*

<sup>d</sup> *Department of Chemistry, University College London, 20 Gordon Street, London, WC1H 0AJ, United Kingdom.*

### SI-1. Dynamic Light Scattering (DLS)

The measurements were carried out in a quartz cuvette of a 10 mm optical path, with four polished sides, using a Litesizer™ 500 DLS equipment provided with a Laser diode light source (output power = 40 mW, and  $\lambda = 658$  nm). The cuvette was washed in an ultrasonic bath using detergent (Merck, Extran MA 02), deionized water, and isopropyl alcohol (Synth), each step for 10 minutes, followed by drying in an oven for 2 hours. We evaluate several aqueous mixtures, as follow: an aqueous solution of a poly-salt PSS with 0.93 wt.% (PSSNa,  $M_w = 70$  kDa, Aldrich), without the addition of OA, named the “OA-free PSSNa” sample. An aqueous solution of a poly-acid PSS of 0.93 wt.% (PSS,  $M_w = 75$  kDa, Aldrich) was also prepared without the addition of OA named the “OA-free PSS” sample. We also prepared four solutions of poly-acid PSS with addition of OA named as PSS + X (with X= 0.5P, 1P, 3P and 5P), as follows: For the PSS + 0.5P solution, in 3 mL of poly-acid PSS of 0.93 wt.%, 0.1 mg of  $\text{Fe}_2(\text{SO}_4)_3 \cdot 5\text{H}_2\text{O}$  (>99%, Synth) and 9.5 mg of  $\text{Na}_2\text{S}_2\text{O}_8$  (>98%, Aldrich) were added to the mixture. For the solutions PSS + 1P, PSS + 3P, and PSS + 5P, the amount of  $\text{Fe}_2(\text{SO}_4)_3 \cdot 5\text{H}_2\text{O}$  and  $\text{Na}_2\text{S}_2\text{O}_8$  varied as 0.2 mg and 18.9 mg, 0.6 mg and 56.7 mg, 1.0 mg and 94.6 mg, respectively. Additionally, two emulsions were prepared, first of EDOT, mixing 11.2 mg of EDOT (97%, Aldrich) in 3 mL of deionized water. And second of PSS with EDOT, prepared mixing 3 mL of poly-acid PSS of 0.93 wt.% with 11.2 mg of EDOT, named the “PSS + EDOT” sample. All samples were vigorously stirred for 10 min before the DLS measurement.

#### DLS data analysis

The electric field-field correlation functions,  $g^l(\tau)$  of each sample were fitted using the multiexponential method.  $g^l(\tau) = B + \sum A_i e^{-D_i q^2 \tau}$ , as referred in the main text. This expression was used for performing multi-exponential fits for the determination of diffusion coefficients ( $D_i$ ) for particles present in the solution, as follow:

#### PSSNa

$$g^1(\tau) = A_2 e^{D_2 q^2 \tau} + A_3 e^{D_3 q^2 \tau} + y_0 \quad (\text{Eq. SI-1})$$

**Table SI -1.** Fitting parameters of DLS measurements for free-OA PSSNa solution using Equation SI-1.

| $A_2$           | $D_2$                                  | $A_3$           | $D_3$                                  | $y_0$             |
|-----------------|----------------------------------------|-----------------|----------------------------------------|-------------------|
| $0.65 \pm 0.01$ | $1.61\text{E}^{-6} \pm 4\text{E}^{-8}$ | $0.31 \pm 0.01$ | $2.34\text{E}^{-7} \pm 1\text{E}^{-8}$ | $0.016 \pm 0.001$ |

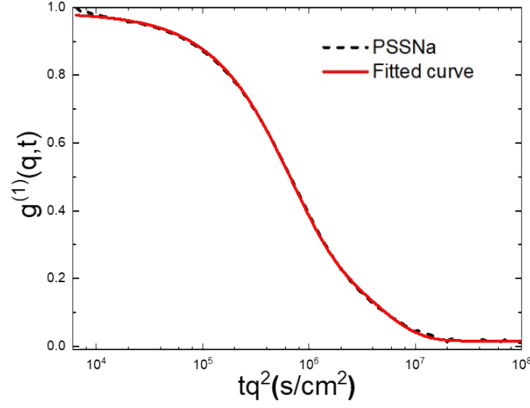

**Figure SI -1.** Field-correlation functions  $g^1(\tau)$  and fitting curves for free-OA PSSNa solution.

**PSS**

$$g^1(\tau) = A_1 e^{D_1 q^2 \tau} + A_2 e^{D_2 q^2 \tau} + A_3 e^{D_3 q^2 \tau} + y_0 \quad (\text{Eq. SI-2})$$

**Table SI -2.** Fitting parameters of DLS measurements for free-OA PSS solution using Equation SI-2.

| $y_0$             | $A_1$           | $D_1$                    | $A_2$           | $D_2$                    | $A_3$           | $D_3$                    |
|-------------------|-----------------|--------------------------|-----------------|--------------------------|-----------------|--------------------------|
| $0.016 \pm 0.002$ | $0.37 \pm 0.02$ | $1.13E^{-5} \pm 2E^{-7}$ | $0.30 \pm 0.01$ | $1.56E^{-6} \pm 6E^{-8}$ | $0.30 \pm 0.01$ | $1.59E^{-7} \pm 1E^{-9}$ |

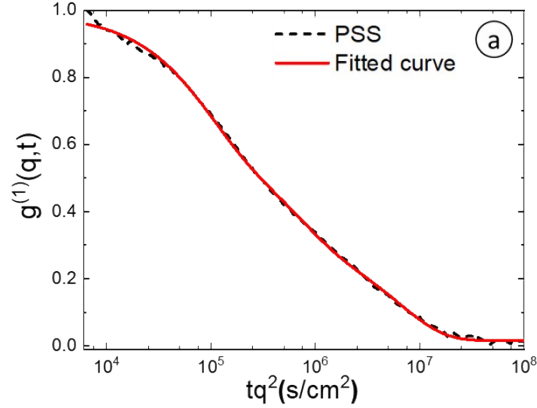

**Figure SI -2.** Field-correlation functions  $g^1(\tau)$  and fitting curves for free-OA PSS solution.

**PSS + 0.5P**

**Table SI -3.** Fitting parameters of DLS measurements for PSS + 0.5P solution using Equation SI-1.

| $y_0$             | $A_2$           | $D_2$                    | $A_3$           | $D_3$                    |
|-------------------|-----------------|--------------------------|-----------------|--------------------------|
| $0.016 \pm 0.001$ | $0.61 \pm 0.01$ | $1.50E^{-6} \pm 9E^{-9}$ | $0.36 \pm 0.01$ | $3.43E^{-7} \pm 4E^{-9}$ |

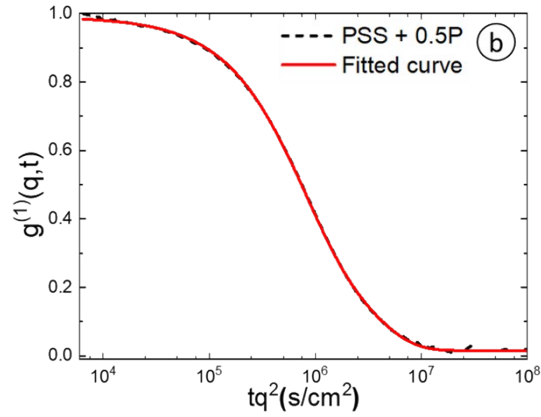

**Figure SI -3.** Field-correlation functions  $g^l(\tau)$  and fitting curves for PSS + 0.5P solution.

**PSS + 1P**

**Table SI -4.** Fitting parameters of DLS measurements for PSS + 1P solution using Equation SI-1.

| $y_0$             | $A_2$           | $D_2$                    | $D_3$           | $D_3$                    |
|-------------------|-----------------|--------------------------|-----------------|--------------------------|
| $0.015 \pm 0.001$ | $0.49 \pm 0.04$ | $1.28E^{-6} \pm 1E^{-8}$ | $0.46 \pm 0.04$ | $3.87E^{-7} \pm 5E^{-9}$ |

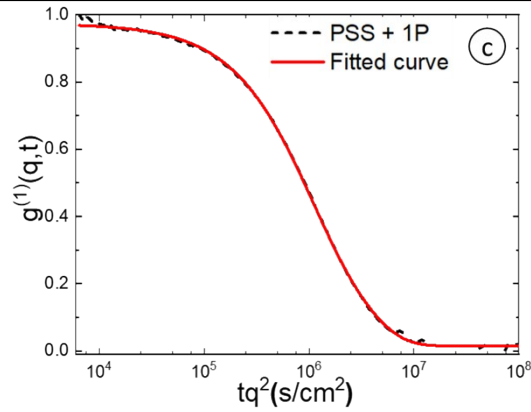

**Figure SI -4.** Field-correlation functions  $g^l(\tau)$  and fitting curves for PSS + 1P solution.

**PSS + 3P**

**Table SI -5.** Fitting parameters of DLS measurements for PSS + 3P solution using Equation SI-1.

| $A_2$           | $D_2$                    | $A_3$           | $D_3$                    | $y_0$             |
|-----------------|--------------------------|-----------------|--------------------------|-------------------|
| $0.28 \pm 0.04$ | $1.25E^{-6} \pm 6E^{-8}$ | $0.70 \pm 0.04$ | $4.34E^{-7} \pm 7E^{-9}$ | $0.014 \pm 0.001$ |

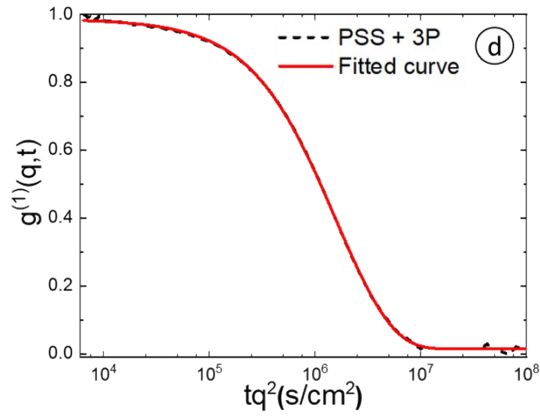

**Figure SI -5.** Field-correlation functions  $g^1(\tau)$  and fitting curves for PSS + 3P solution.

**PSS + 5P**

**Table SI -6** Fitting parameters of DLS measurements for PSS + 5P solution using Equation SI-1.

| $A_2$           | $D_2$                    | $A_3$           | $D_3$                    | $y_0$             |
|-----------------|--------------------------|-----------------|--------------------------|-------------------|
| $0.17 \pm 0.03$ | $1.44E^{-6} \pm 1E^{-7}$ | $0.80 \pm 0.03$ | $4.59E^{-7} \pm 1E^{-8}$ | $0.016 \pm 0.001$ |

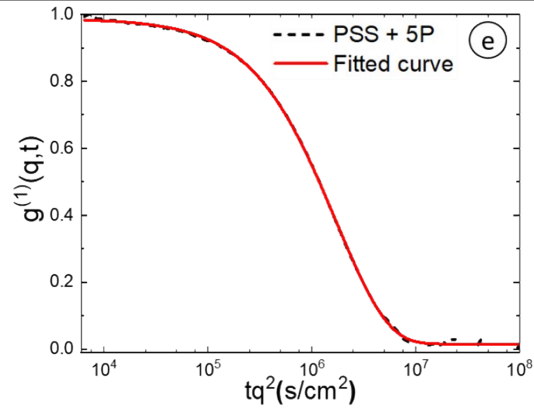

**Figure SI -6.** Field-correlation functions  $g^1(\tau)$  and fitting curves for PSS + 5P solution.

**Emulsions of EDOT and PSS + EDOT**

**EDOT**

$$g^1(\tau) = Ae^{Dq^2\tau} + y_0 \quad (\text{Eq. SI-3})$$

**Table SI -7** Fitting parameters of DLS measurements for EDOT aqueous emulsion using Equation SI-3.

| $A$               | $D$                       | $y_0$             |
|-------------------|---------------------------|-------------------|
| $0.958 \pm 0.001$ | $4.73E^{-8} \pm 1E^{-10}$ | $0.029 \pm 0.001$ |

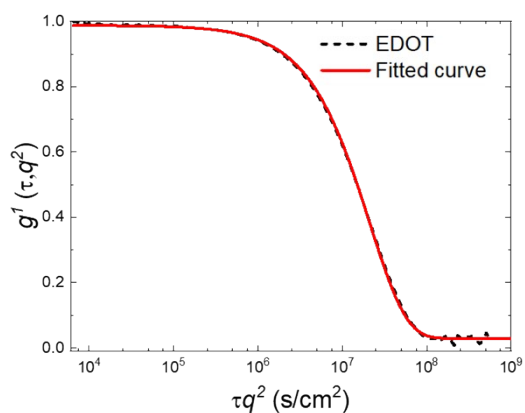

**Figure SI -7.** Field-correlation functions  $g^l(\tau)$  and fitting curves for EDOT emulsion.

***PSS + EDOT***

**Table SI -8** Fitting parameters of DLS measurements for PSS + EDOT aqueous emulsion using Equation SI-1.

| $A_2$           | $D_2$               | $A_3$           | $D_3$               | $y_0$             |
|-----------------|---------------------|-----------------|---------------------|-------------------|
| $0.68 \pm 0.02$ | $2.90E-8 \pm 3E-10$ | $0.28 \pm 0.02$ | $7.98E-9 \pm 2E-11$ | $0.021 \pm 0.001$ |

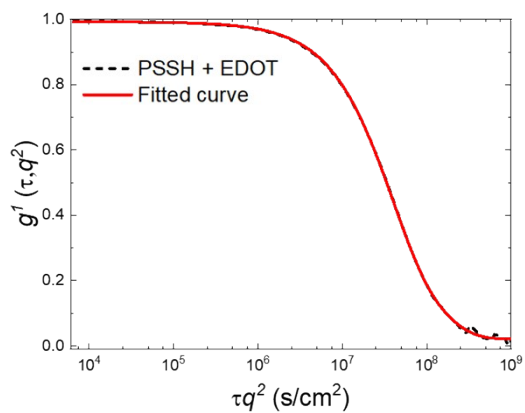

**Figure SI -8.** Field-correlation functions  $g^l(\tau)$  and fitting curves for PSS + EDOT emulsion.

## SI-2. UV-Vis absorption spectra

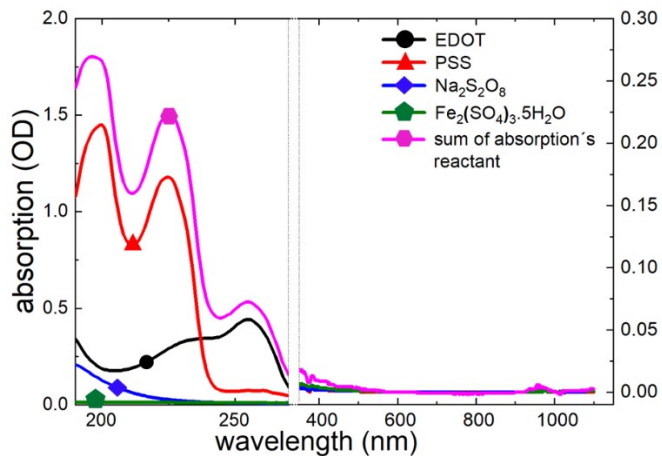

**Figure SI -9.** UV-Vis spectra of individual reactants for PEDOT:PSS polymerization. Here, the concentration of all reactants is the same as used in the 1P ink polymerization, then 10  $\mu\text{L}$  aliquot was diluted in 2990  $\mu\text{L}$  of deionized water, as reported in SI-1.

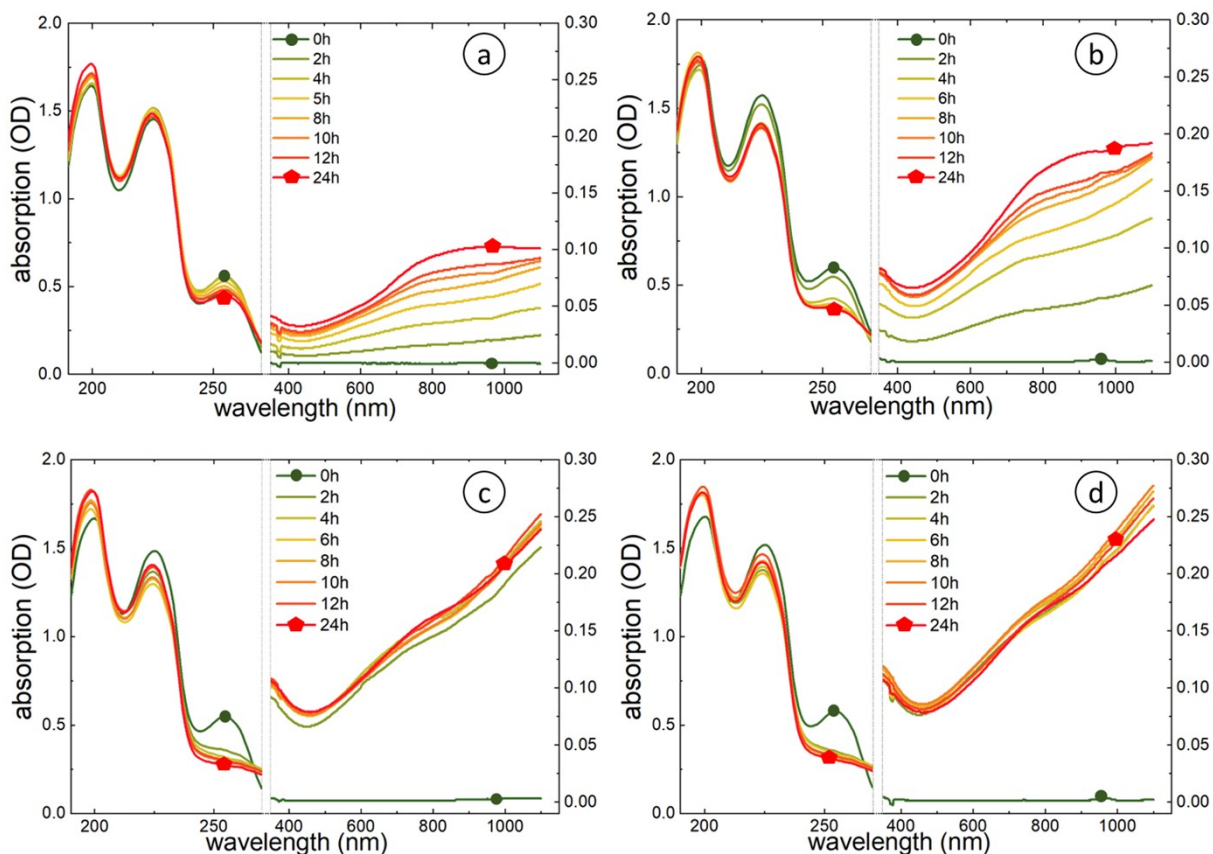

**Figure SI -10.** UV-Vis spectra of PEDOT:PSS inks during the polymerization. Each spectrum was taken every 2h until the first 12h of reaction; a) 0.5P; b) 1P; c) 3P and d) 5P. It is also present a final sample that was collected after 24h of reaction.

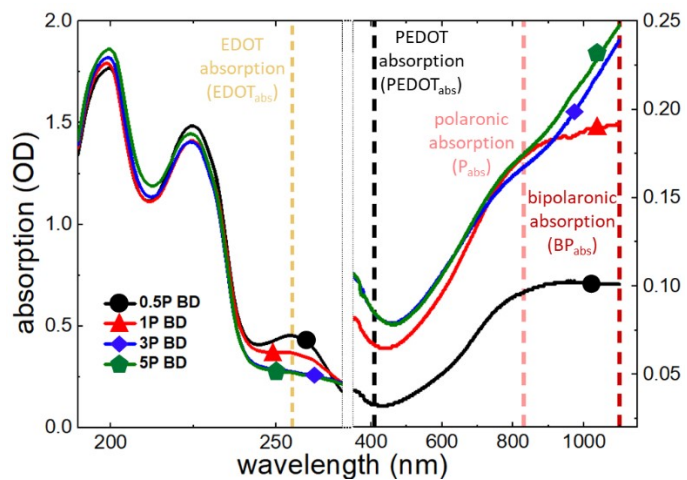

**Figure SI -11.** UV-Vis spectra of PEDOT:PSS inks after 24 h of polymerization, before the dialysis (BD).



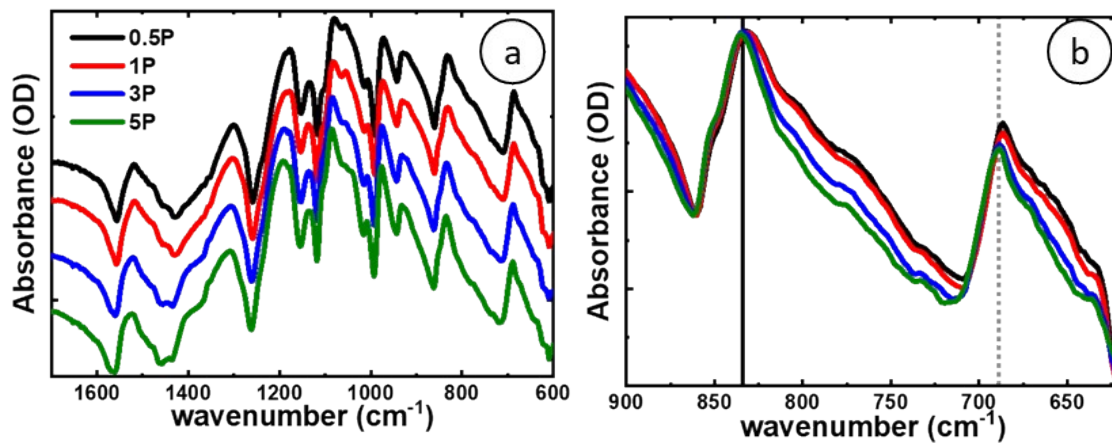

### SI-3. FTIR absorption and XPS spectra

**Figure SI -12.** a) FTIR spectra of PEDOT:PSS inks. For better presentation the individual curves are offset. b) Close view of spectrum region between 900 and 600  $\text{cm}^{-1}$ .

**Table SI -9.** PEDOT:PSS inks code, FTIR absorption intensity in 835  $\text{cm}^{-1}$  and 685  $\text{cm}^{-1}$ , respectively and FTIR intensity ratios between 835  $\text{cm}^{-1}$  and 685  $\text{cm}^{-1}$ .

| Code | 835 $\text{cm}^{-1}$ | 685 $\text{cm}^{-1}$ | 835 $\text{cm}^{-1}$ /685 $\text{cm}^{-1}$ |
|------|----------------------|----------------------|--------------------------------------------|
| 0.5P | 0.067                | 0.057                | 1.17                                       |
| 1P   | 0.053                | 0.043                | 1.23                                       |
| 3P   | 0.037                | 0.026                | 1.43                                       |
| 5P   | 0.027                | 0.015                | 1.82                                       |

#### SI-4. XPS fittings

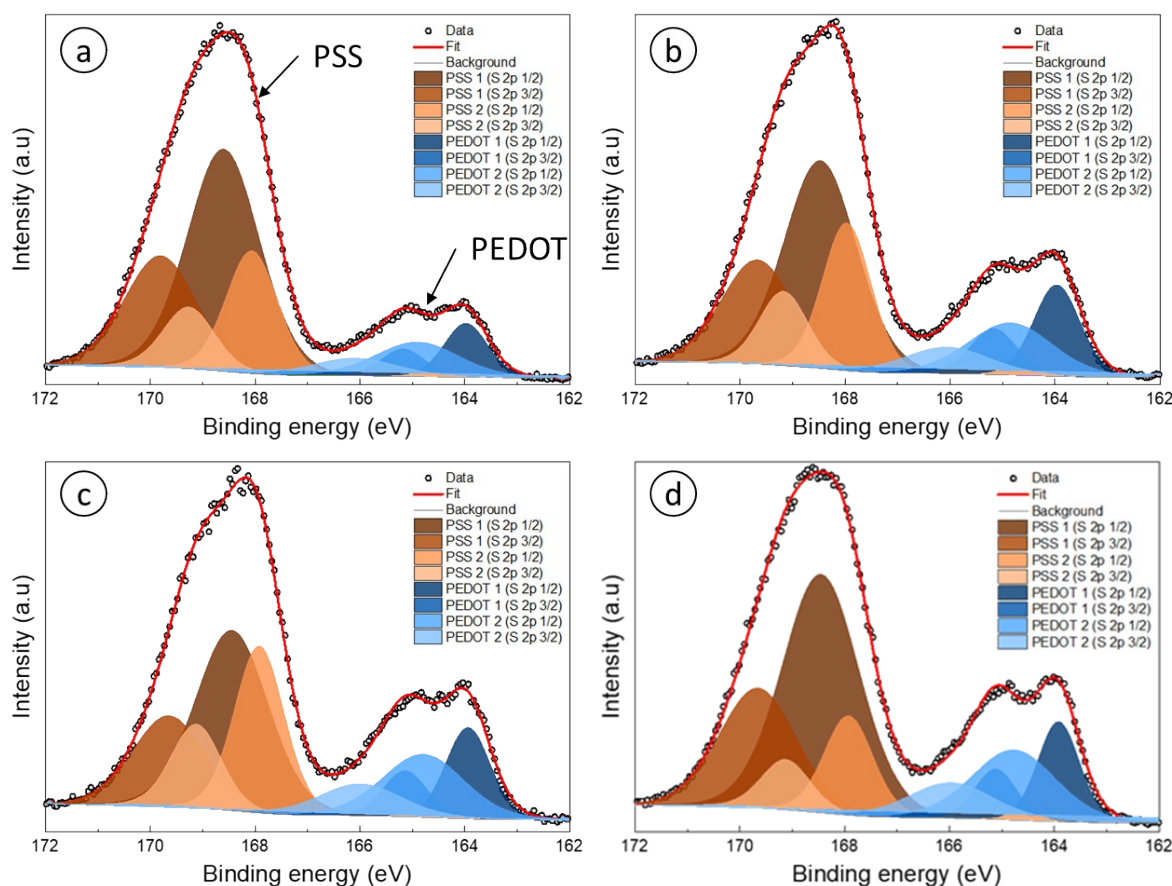

**Figure SI -13.** XPS spectra showing S(2p) signals for PEDOT:PSS a)0.5P, b)1P, c)3P and d)5P.

**Table SI-10.** XPS deconvoluted peaks areas and ratios of the PEDOT:PSS inks. PSS1+2 and PEDOT1+2 correspond to the summation of PSS<sub>1</sub>(S 2p<sub>1/2</sub>), PSS<sub>1</sub>(S 2p<sub>3/2</sub>), PSS<sub>2</sub>(S 2p<sub>1/2</sub>), PSS<sub>2</sub>(S 2p<sub>3/2</sub>) peak areas and PEDOT<sub>1</sub>(S 2p<sub>1/2</sub>), PEDOT<sub>1</sub>(S 2p<sub>3/2</sub>), PEDOT<sub>2</sub>(S 2p<sub>1/2</sub>), PEDOT<sub>2</sub>(S 2p<sub>3/2</sub>) peak areas, respectively.

| Code        | PSS <sub>1</sub><br>(S 2p <sub>1/2</sub> ) | PSS <sub>1</sub><br>(S 2p <sub>3/2</sub> ) | PSS <sub>2</sub><br>(S 2p <sub>1/2</sub> ) | PSS <sub>2</sub><br>(S 2p <sub>3/2</sub> ) | PEDOT <sub>1</sub><br>(S 2p <sub>1/2</sub> ) | PEDOT <sub>1</sub><br>(S 2p <sub>3/2</sub> ) | PEDOT <sub>2</sub><br>(S 2p <sub>1/2</sub> ) | PEDOT <sub>2</sub><br>(S 2p <sub>3/2</sub> ) | Ratio<br>(PSS <sub>1</sub> +PSS <sub>2</sub> )/(PE<br>DOT <sub>1</sub> +PEDOT <sub>2</sub> ) |
|-------------|--------------------------------------------|--------------------------------------------|--------------------------------------------|--------------------------------------------|----------------------------------------------|----------------------------------------------|----------------------------------------------|----------------------------------------------|----------------------------------------------------------------------------------------------|
|             | %Area                                      | %Area                                      | %Area                                      | %Area                                      | %Area                                        | %Area                                        | %Area                                        |                                              |                                                                                              |
| <b>0.5P</b> | 38.96                                      | 19.47                                      | 15.29                                      | 7.64                                       | 5.62                                         | 2.81                                         | 6.81                                         | 3.40                                         | 4.4                                                                                          |
| <b>1P</b>   | 32.58                                      | 16.28                                      | 15.54                                      | 7.77                                       | 9.12                                         | 4.56                                         | 9.33                                         | 4.71                                         | 2.6                                                                                          |
| <b>3P</b>   | 28.55                                      | 14.27                                      | 18.18                                      | 9.09                                       | 8.79                                         | 4.39                                         | 11.16                                        | 5.58                                         | 2.3                                                                                          |
| <b>5P</b>   | 36.95                                      | 18.47                                      | 9.75                                       | 4.87                                       | 8.35                                         | 4.18                                         | 11.62                                        | 5.81                                         | 2.3                                                                                          |
